# Supplementary material for: Terrestrial and Aquatic Carbon Dynamics in Tropical Peatlands under Different Land Use Types: A Systematic Review Protocol
Source: MDPI journal article supplement (doi:10.3390/f12101298), 2021-09-23
Supplement: s1 [file s1]

## Supplementary Information

### Terrestrial and aquatic carbon dynamics in tropical peatlands under different land use types: a systematic review protocol

Sigit D. Sasmito <sup>1,2\*</sup>, Pierre Taillardat <sup>1,2\*</sup>, Letisha S. Fong <sup>1,2,\*</sup>, Jonathan W.F. Ren <sup>1,2</sup>, Hanna Sundahl <sup>1,2</sup>, Lahiru Wijidasa <sup>1</sup>, Aditya Bandla <sup>1</sup>, Nura Arifin-Wong <sup>1</sup>, Ashwin Sridhar Sudarshan <sup>1</sup>, Suria Tarigan <sup>3</sup>, Muh Taufik <sup>4</sup>, Sorain J. Ramchunder <sup>2</sup>, Massimo Lupascu <sup>2</sup>, and David Taylor <sup>2</sup>

<sup>1</sup> NUS Environmental Research Institute, National University of Singapore, 5A Engineering Drive 21 Lower Kent Ridge Road, Singapore 117411, Singapore;

<sup>2</sup> Department of Geography, National University of Singapore, Singapore 117570, Singapore;

<sup>3</sup> Department of Soil Science and Land Resource, IPB University, Bogor 16680, Indonesia;

<sup>4</sup> Department of Geophysics and Meteorology, Faculty of Mathematics and Natural Sciences, IPB University, Bogor 16680, Indonesia;

\* Authors contributed equally to this work

<sup>†</sup> Correspondence: eriv111@nus.edu.sg

## Supplementary Information

**Table S1.** List of used publications to test the effectiveness of search string.

| No | Short ref.                 | Full reference                                                                                                                                                                                                                                                             | Document type           |
|----|----------------------------|----------------------------------------------------------------------------------------------------------------------------------------------------------------------------------------------------------------------------------------------------------------------------|-------------------------|
| 1  | Ali et al., 2006           | Ali, M., Taylor, D. & Inubushi, K. (2006) Effects of environmental variations on CO <sub>2</sub> efflux from a tropical peatland in Eastern Sumatra. <i>Wetlands</i> 26: 612–618.                                                                                          | Journal article         |
| 2  | Basuki et al., 2012        | Basuki, S., Suwardi & Munoz, C.P. (2012) Emission of CO <sub>2</sub> and CH <sub>4</sub> from plantation forest of <i>Acacia crassiparva</i> on peatlands in Indonesia. In: Proceedings of the 14th International Peat Congress. Stockholm, Sweden, 3–8 June.              | Conference paper        |
| 3  | Brady, 1997                | Brady, M.A. (1997) Organic matter dynamics of coastal peat deposits in Sumatra, Indonesia [PhD thesis]. Department of Forestry, University of British Columbia, Vancouver, Canada.                                                                                         | Thesis                  |
| 4  | Chimner & Ewel, 2004       | Chimner, R.A. & Ewel, K.C. (2004) Differences in carbon fluxes between forested and cultivated Micronesian tropical peatlands. <i>Wetlands Ecology and Management</i> 12: 419–427.                                                                                         | Journal article         |
| 5  | Chimner & Ewel, 2005       | Chimner, R.A. & Ewel, K.C. (2005) A tropical freshwater wetland: II. Production, decomposition, and peat formation. <i>Wetlands Ecology and Management</i> 13: 671–684.                                                                                                    | Journal article         |
| 6  | Chimner, 2004              | Chimner, R.A. (2004) Soil respiration rates of tropical peatlands in Micronesia and Hawaii. <i>Wetlands</i> 24: 51–56.                                                                                                                                                     | Journal article         |
| 7  | Comeau et al., 2013        | Comeau, L.-P., Hergoualc'h, K., Smith, J.U. & Verchot, L. (2013) Conversion of intact peat swamp forest to oil palm plantation: effects on soil CO <sub>2</sub> fluxes in Jambi, Sumatra. Working Paper 110. Bogor, Indonesia: Center for International Forestry Research. | Working paper or report |
| 8  | Couwenberg & Hooijer, 2013 | Couwenberg, J. & Hooijer, A. (2013) Towards robust subsidence-based soil carbon emission factors for peat soils in south-east Asia, with special reference to oil palm plantations. <i>Mires and Peat</i> 12: 1–13.                                                        | Journal article         |
| 9  | Dariah et al., 2013        | Dariah, A., Marwanto, S. & Agus, F. (2013) Peat CO <sub>2</sub> emissions from oil palm plantations, separating root-related and heterotrophic respirations. <i>Mitigation and Adaptation Strategies for Global Change</i> doi: 10.1007/S11027/013/95915/6.                | Journal article         |

|    |                             |                                                                                                                                                                                                                                                                                                                                                                                                                                                                                                                                                                       |                         |
|----|-----------------------------|-----------------------------------------------------------------------------------------------------------------------------------------------------------------------------------------------------------------------------------------------------------------------------------------------------------------------------------------------------------------------------------------------------------------------------------------------------------------------------------------------------------------------------------------------------------------------|-------------------------|
| 10 | Darung et al., 2005         | Darung, U., Morishita, T., Takakai, F., Dohong, S., Limin, H.S. & Hatano, R. (2005) The effects of forest fire and agriculture on CO <sub>2</sub> emissions from tropical peatlands, Central Kalimantan, Indonesia. In: Proceedings of the International Workshop on Human Dimension of Tropical Peatland under Global Environmental Changes, pp. 112–119. Bogor, Indonesia, 8–9 December 2004.                                                                                                                                                                       | Conference paper        |
| 11 | DID & LAWO, 1996            | DID and LAWO (1996) Western Jahore integrated agricultural development project. Peat soil management study. Department of Irrigation and Drainage (DID), Kuala Lumpur, Malaysia, and Land and Water Research Group (LAWO), Wageningen, The Netherlands.                                                                                                                                                                                                                                                                                                               | Working paper or report |
| 12 | Furukawa et al., 2005       | Furukawa, Y., Inubushi, K., Ali, M., Itang, A.M. & Tsuruta, H. (2005) Effect of changing groundwater levels caused by land-use changes on greenhouse gas emissions from tropical peatlands. <i>Nutrient Cycling in Agroecosystems</i> 71: 81–91.                                                                                                                                                                                                                                                                                                                      | Journal article         |
| 13 | Gill & Jackson, 2000        | Gill, R.A. & Jackson, R.B. (2000) Global patterns of root turnover for terrestrial ecosystems. <i>New Phytologist</i> 147: 13–31.                                                                                                                                                                                                                                                                                                                                                                                                                                     | Journal article         |
| 14 | Hadi et al., 2005           | Hadi, A., Inubushi, K., Furukawa, Y., Purnomo, E., Rasmadi, M. & Tsuruta, H. (2005) Greenhouse gas emissions from tropical peatlands of Kalimantan, Indonesia. <i>Nutrient Cycling in Agroecosystems</i> 71: 73–80.                                                                                                                                                                                                                                                                                                                                                   | Journal article         |
| 15 | Hairiah et al., 1999        | Hairiah, K., van Noordwijk, M. & Cadisch, G. (1999) Roots as part of the carbon and nitrogen input and output of three types of cropping systems on an Ultisol in North Lampung. In: Proceedings of the Seminar Toward Sustainable Agriculture in Humid Tropics Facing 21st Century, ed. C. Ginting, A. Gafur & FX Susilo, pp. 86–95. Bandar Lampung, Indonesia, 27–28 September. Bogor, Indonesia: International Centre for Research in Agroforestry.                                                                                                                | Conference paper        |
| 16 | Hairiah et al., 2000        | Hairiah, K., van Noordwijk, M. & Cadisch, G. (2000) Crop yield, C and N balance of three types of cropping systems on an Ultisol in Northern Lampung. <i>Netherlands Journal of Agricultural Science</i> 48: 3–17.                                                                                                                                                                                                                                                                                                                                                    | Journal article         |
| 17 | Harrison et al., 2007       | Harrison, M.E., Cheyne, S.M., Sulistiyanto, Y. & Rieley, J.O. (2007) Biological effects of smoke from dryseason fires in non-burnt areas of the Sabangau peat swamp forest, Central Kalimantan, Indonesia. Paper presented at International Symposium and Workshop Carbon–Climate–Human Interactions: Carbon Pools, Fire, Mitigation, Restoration and Wise Use, Yogyakarta, Indonesia, 27–31 August. [www document] URL <a href="http://www.geog.le.ac.uk/carbopeat/media/pdf/yogyapapers/p9.pdf">http://www.geog.le.ac.uk/carbopeat/media/pdf/yogyapapers/p9.pdf</a> | Conference paper        |
| 18 | Henson & Dolmat, 2003       | Henson, I.E. & Dolmat, M.T. (2003) Physiological analysis of an oil palm density trial on a peat soil. <i>Journal of Oil Palm Research</i> 15: 1–27.                                                                                                                                                                                                                                                                                                                                                                                                                  | Journal article         |
| 19 | Hergoualc'h & Verchot, 2011 | Hergoualc'h, K. & Verchot, L.V. (2011) Stocks and fluxes of carbon associated with land-use change in Southeast Asian tropical peatlands: a review. <i>Global Biochemical Cycles</i> 25: GB2001. doi: 2010.1029/2009GB003718.                                                                                                                                                                                                                                                                                                                                         | Journal article         |
| 20 | Hertel et al., 2009         | Hertel, D., Hartevel, M.A. & Leuschner, C. (2009) Conversion of a tropical forest into agroforest alters the fine root-related carbon flux to the soil. <i>Soil Biology and Biochemistry</i> 41: 481–490.                                                                                                                                                                                                                                                                                                                                                             | Journal article         |
| 21 | Hirano et al., 2009         | Hirano, T., Jauhiainen, J., Inoue, T. & Takahashi, H. (2009) Controls on the carbon balance of tropical peatlands. <i>Ecosystems</i> 12: 873–887.                                                                                                                                                                                                                                                                                                                                                                                                                     | Journal article         |
| 22 | Hirano et al., 2012         | Hirano, T., Segah, H., Kusin, K., Limin, S., Takahashi, H. & Osaki, M. (2012) Effects of disturbances on the carbon balance of tropical peat swamp forests. <i>Global Change Biology</i> 18: 3410–3422.                                                                                                                                                                                                                                                                                                                                                               | Journal article         |
| 23 | Hooijer et al., 2012        | Hooijer, A., Page, S., Jauhiainen, J., Lee, W.A., Lu, X.X., Idris, A. & Anshari, G. (2012) Subsidence and carbon loss in drained tropical peatlands. <i>Biogeosciences</i> 9: 1053–1071.                                                                                                                                                                                                                                                                                                                                                                              | Journal article         |
| 24 | Inubushi et al., 1998       | Inubushi, K., Hadi, A., Okazaki, M. & Yonebayashi, K. (1998) Effect of converting wetland forest to sago palm plantations on methane gas flux and organic carbon dynamics in tropical peat soil. <i>Hydrological Processes</i> 12: 2073–2080.                                                                                                                                                                                                                                                                                                                         | Journal article         |

|    |                                 |                                                                                                                                                                                                                                                                                                                                                                                    |                  |
|----|---------------------------------|------------------------------------------------------------------------------------------------------------------------------------------------------------------------------------------------------------------------------------------------------------------------------------------------------------------------------------------------------------------------------------|------------------|
| 25 | Inubushi et al., 2003           | Inubushi, K., Furukawa, Y., Hadi, A., Purnomo, E. & Tsuruta, H. (2003) Seasonal changes of CO <sub>2</sub> , CH <sub>4</sub> and N <sub>2</sub> O fluxes in relation to land-use change in tropical peatlands located in coastal area of South Kalimantan. <i>Chemosphere</i> 52: 603–608.                                                                                         | Journal article  |
| 26 | Ishida et al., 2001             | Ishida, T., Suzuki, S., Nagano, T., Osawa, K., Yoshino, K., Fukumura, K. & Nuyim, T. (2001) CO <sub>2</sub> emission rate from a primary peat swamp forest ecosystem in Thailand. <i>Environmental Control in Biology</i> 39: 305–312.                                                                                                                                             | Journal article  |
| 27 | Jauhiainen & Silvennoinen, 2012 | Jauhiainen, J. & Silvennoinen, H. (2012) Diffusion GHG fluxes at tropical peatland drainage canal water surfaces. <i>Suo</i> 63: 93–105.                                                                                                                                                                                                                                           | Journal article  |
| 28 | Jauhiainen et al., 2008         | Jauhiainen, J., Limin, S., Silvennoinen, H. & Vasander, H. (2008) Carbon dioxide and methane fluxes in drained tropical peat before and after hydrological restoration. <i>Ecology</i> 89: 3503–3514.                                                                                                                                                                              | Journal article  |
| 29 | Jauhiainen et al., 2012a        | Jauhiainen, J., Hooijer, A. & Page, S.E. (2012a) Carbon dioxide emissions from an Acacia plantation on peatland in Sumatra, Indonesia. <i>Biogeosciences</i> 9: 617–630.                                                                                                                                                                                                           | Journal article  |
| 30 | Jauhiainen et al., 2012c        | Jauhiainen, J., Hooijer, A. & Page, S.E. (2012c) Greenhouse gas emissions from a plantation on thick tropical peat. In: <i>Proceedings of the 14th International Peat Congress</i> . Stockholm, Sweden, 3–8 June.                                                                                                                                                                  | Conference paper |
| 31 | Lamade & Bouillet, 2005         | Lamade, E. & Bouillet, J.-P. (2005) Carbon storage and global change: the role of oil palm. <i>OCL: Oléagineux, Corps Gras, Lipides</i> 12: 154–160.                                                                                                                                                                                                                               | Journal article  |
| 32 | Marwanto & Agus, 2013           | Marwanto, S. & Agus, F. (2013) Is CO <sub>2</sub> flux from oil palm plantations on peatland controlled by water table, soil moisture, day/night rhythm and/or temperature? <i>Mitigation and Adaptation Strategies for Global Change</i> doi 10.1007/s11027-013-9518-3.                                                                                                           | Journal article  |
| 33 | Matthews et al., 2000           | Matthews, R.B., Wassmann, R., Buendia, L.V. & Knox, J.W. (2000) Using a crop/soil simulation model and GIS techniques to assess methane emissions from rice fields in Asia: II. Model validation and sensitivity analysis. <i>Nutrient Cycling in Agroecosystems</i> 58: 161–177.                                                                                                  | Journal article  |
| 34 | Melling et al., 2005a           | Melling, L., Hatano, R. & Goh, K.J. (2005a) Soil CO <sub>2</sub> flux from three ecosystems in tropical peatland of Sarawak, Malaysia. <i>Tellus</i> 57B: 1–11.                                                                                                                                                                                                                    | Journal article  |
| 35 | Melling et al., 2007a           | Melling, L., Goh, K.J., Beauvais, C. & Hatano, R. (2007a) Carbon flow and budget in a young mature oil palm agroecosystem on deep tropical peat. <i>International Symposium and Workshop on Tropical Peatland</i> , Yogyakarta, Indonesia, 27–31 August.                                                                                                                           | Conference paper |
| 36 | Melling et al., 2013            | Melling, L., Chaddy, A., Goh, K.J. & Hatano, R. (2013) Soil CO <sub>2</sub> fluxes from different ages of oil palm in tropical peatland of Sarawak, Malaysia as influenced by environmental and soil properties. <i>Acta Horticulturae</i> 982: 25–35.                                                                                                                             | Journal article  |
| 37 | Rahaoje et al., 2000            | Rahajoe, J.S., Kohyama, T. & Limin, S.H. (2000) Litter decomposition process in two contrastive nutrient limited forest types in central Kalimantan. In: <i>Proceedings of the International Symposium on Tropical Peatlands</i> , ed. T. Iwakuma, pp. 223–231. Bogor, Indonesia, 22–23 November 1999. Hokkaido University and Indonesian Institute of Sciences, Bogor, Indonesia. | Conference paper |
| 38 | Shimamura & Momose, 2005        | Shimamura, T. & Momose, K. (2005) Organic matter dynamics control plant species coexistence in a tropical peat swamp forest. <i>Proceedings of the Royal Society B: Biological Sciences</i> 272: 1503–1510.                                                                                                                                                                        | Journal article  |
| 39 | Sulistiyanto, 2004              | Sulistiyanto, Y. (2004) Nutrient dynamics in different sub-types of peat swamp forest in central Kalimantan, Indonesia [PhD thesis]. University of Nottingham, Nottingham, UK.                                                                                                                                                                                                     | Thesis           |
| 40 | Sundari et al., 2012            | Sundari, S., Hirano, T., Yamada, H., Kusin, K. & Limin, S. (2012) Effects of groundwater level on soil respiration in tropical peat swamp forests. <i>Journal of Agricultural Meteorology</i> 68: 121–134.                                                                                                                                                                         | Journal article  |

|    |                       |                                                                                                                                                                                                                                                                                                                               |                 |
|----|-----------------------|-------------------------------------------------------------------------------------------------------------------------------------------------------------------------------------------------------------------------------------------------------------------------------------------------------------------------------|-----------------|
| 41 | Warren et al., 2012   | Warren, M.W., Kauffmann, J.B., Murdiyarso, D., Anshari, G., Hergoualc'h, K., Kurnianto, S., Purbopuspito, J., Gusmayanti, E., Afifudin, M., Rahajoe, J., Alhamd, L., Limin, S. & Iswandi, A. (2012) A cost-efficient method to assess carbon stocks in tropical peat soil. <i>Biogeosciences</i> 9: 4477–4485.                | Journal article |
| 42 | Watanabe et al., 2009 | Watanabe, A., Purwanto, B.H., Ando, H., Kakuda, K.-i. & Jong, F.-S. (2009) Methane and CO <sub>2</sub> fluxes from an Indonesian peatland used for sago palm ( <i>Metroxylon sagu</i> Rottb.) cultivation: effects of fertilizer and groundwater level management. <i>Agriculture, Ecosystems and Environment</i> 134: 14–18. | Journal article |

## Supplementary Information

**Table S2.** The development of search string for literature search in the databases.

| No | Database       | Search string                                                                                                                                                                                                                                                                                                                                                                                                                                                                                                                                                                                                | Date of literature search | Search results | Duplicates | Total literature record minus duplicates | Note                                                  |
|----|----------------|--------------------------------------------------------------------------------------------------------------------------------------------------------------------------------------------------------------------------------------------------------------------------------------------------------------------------------------------------------------------------------------------------------------------------------------------------------------------------------------------------------------------------------------------------------------------------------------------------------------|---------------------------|----------------|------------|------------------------------------------|-------------------------------------------------------|
| #1 | Web of Science | TOPIC: (peatland* AND tropic*) AND TOPIC: (undisturb* OR clear* OR pristine OR intact OR plantation OR log* OR harvest* OR agricultur* OR "land use change" OR "oil palm" OR "rice cultivation" OR "rice farm*" OR mining OR degrad* OR disturb* OR "land cover change" OR deforest* OR conversion OR rehabilit* OR restor*) AND TOPIC: (ecosystem OR biomass OR soil* OR NPP OR productivity OR "root product*" OR respiration OR efflux OR sequest* OR "greenhouse gas*" OR GHG OR flux*) AND TOPIC: ("carbon stock*" OR methane OR CO <sub>2</sub> or CH <sub>4</sub> OR 13C OR 14C OR "stable isotope*") | 10th May 2020             | 202            | 0          | 202                                      |                                                       |
| #2 | Web of Science | TOPIC: (peat* AND tropic*) AND TOPIC: (ecosystem OR biomass OR soil* OR NPP OR productivity OR "root product*" OR respiration OR efflux OR sequest* OR "greenhouse gas*" OR GHG OR flux* OR river OR fluvial OR stream OR canal OR channel OR leaching OR porewater OR "pore water") AND TOPIC: ("carbon stock*" OR methane OR CO <sub>2</sub> or CH <sub>4</sub> OR 13C OR 14C OR "stable isotope*" OR carbon OR "greenhouse gas*" OR GHG* OR outgas* OR CO <sub>2</sub> OR CH <sub>4</sub> OR methane OR "organic matter")                                                                                 | 4th June 2020             | 743            | 0          | 743                                      |                                                       |
| #3 | Web of Science | TOPIC: (peat* AND tropic*) AND TOPIC: (ecosystem OR biomass OR soil* OR NPP OR productivity OR "root product*" OR respiration OR efflux OR sequest* OR "greenhouse gas*" OR GHG OR flux* OR river OR fluvial OR stream OR canal OR channel OR leaching OR porewater OR "pore water" OR <u>area</u> OR <u>extent</u> ) AND TOPIC: ("carbon stock*" OR methane OR CO <sub>2</sub> or CH <sub>4</sub> OR 13C OR 14C OR "stable isotope*" OR carbon OR "greenhouse gas*" OR GHG* OR outgas* OR CO <sub>2</sub> OR CH <sub>4</sub> OR methane OR "organic matter")                                                | 4th June 2020             | 799            |            | 799                                      | Similar to search #2, with adding "area" and "extent" |
| #4 | Web of Science | TS=("black-water" OR "black water" OR blackwater OR peat* AND tropic*) AND TS=(ecosystem OR biomass OR soil* OR NPP OR productivity OR "root product*" OR respiration OR efflux OR sequest* OR "greenhouse gas*" OR                                                                                                                                                                                                                                                                                                                                                                                          | 5th June 2020             | 1,151          |            | 1151                                     | Similar to search #3, with adding "black-water"       |

|    |                |                                                                                                                                                                                                                                                                                                                                                                                                                                                                                                                                                                                                                                                                                                                                                                                                                                |               |        |  |      |                                                                                         |
|----|----------------|--------------------------------------------------------------------------------------------------------------------------------------------------------------------------------------------------------------------------------------------------------------------------------------------------------------------------------------------------------------------------------------------------------------------------------------------------------------------------------------------------------------------------------------------------------------------------------------------------------------------------------------------------------------------------------------------------------------------------------------------------------------------------------------------------------------------------------|---------------|--------|--|------|-----------------------------------------------------------------------------------------|
|    |                | R GHG OR flux* OR river OR fluvial OR stream OR canal OR channel OR leaching OR porewater OR "pore water" OR area OR extent) AND TS=("carbon stock*" OR methane OR CO2 OR CH4 OR 13C OR 14C OR "stable isotope*" OR carbon OR "greenhouse gas*" OR GHG* OR outgas* OR CO2 OR CH4 OR methane OR "organic matter")<br>Indexes=SCI-EXPANDED, SSCI, A&HCI, CPCI-S, CPCI-SSH, ESCI, CCR-EXPANDED, IC Timespan=All years                                                                                                                                                                                                                                                                                                                                                                                                             |               |        |  |      | OR "black water" OR blackwater                                                          |
| #5 | Web of Science | TS=("black-water" OR "black water" OR blackwater OR peat* OR "peat swamp*" OR PSF) AND TS=(tropic* OR neotropic* OR SEA OR "Southeast Asia" OR "South east Asia" OR "Latin America" OR "Central America" OR Amazon* OR Peru* OR Panama) AND TS=(ecosystem OR biomass OR soil* OR NPP OR productivity OR "root product*" OR respiration OR efflux OR sequest* OR "greenhouse gas*" OR GHG OR flux* OR river OR fluvial OR stream OR canal OR channel OR leaching OR porewater OR "pore water" OR area OR extent) AND TS=("carbon stock*" OR methane OR CO2 OR CH4 OR 13C OR 14C OR "stable isotope*" OR carbon OR "greenhouse gas*" OR GHG* OR outgas* OR CO2 OR CH4 OR methane OR "organic matter" OR POC OR DOC OR DIC)<br>Timespan: All years. Indexes: SCI-EXPANDED, SSCI, A&HCI, CPCI-S, CPCI-SSH, ESCI, CCR-EXPANDED, IC. | 8th June 2020 | 1389   |  | 1389 | similar to search #4, with additional keywords for geographical location justification. |
| #6 | Scopus         | TITLE-ABS-KEY ("black-water" OR "black water" OR blackwater OR peat* OR "peat swamp*" OR psf) AND TITLE-ABS-KEY (tropic* OR neotropic* OR sea OR "Southeast Asia" OR "South east Asia" OR "Latin America" OR "Central America" OR amazon* OR peru* OR panama) AND TITLE-ABS-KEY (ecosystem OR biomass OR soil* OR npp OR productivity OR "root product*" OR respiration OR efflux OR sequest* OR "greenhouse gas*" OR ghg OR flux* OR river OR fluvial OR stream OR canal OR channel OR leaching OR porewater OR "pore water" OR area OR extent) AND TITLE-ABS-KEY ("carbon stock*" OR methane OR co2 OR ch4 OR 13c OR 14c OR "stable isotope*" OR carbon OR "greenhouse gas*" OR ghg* OR outgas* OR co2 OR ch4 OR methane OR "organic matter" OR poc OR doc OR dic)                                                           | 8th June 2020 | 1,390  |  | 1390 | Search string composition similar to search #4.                                         |
| #7 | Scopus         | (peat* OR black-water OR "black water" OR blackwater OR Amazon* OR Peru* OR Pantanal OR Guyana* OR Panama* OR Congo*) AND (river OR fluvial OR stream OR canal OR channel OR leaching OR porewater OR "pore water" OR NPP OR "product*" OR respiration OR *flux* OR sequest OR emission*, OR dynamics OR accumulation OR subsidence OR balance OR cycling OR stor* OR                                                                                                                                                                                                                                                                                                                                                                                                                                                          | 8th June 2020 | 22,998 |  |      |                                                                                         |

|     |                |                                                                                                                                                                                                                                                                                                                                                                                                                                                                                                                                                                                                                                                                                                                                                                                                                                                                                                                                                                                                                                                                                                                                                                                                     |                |        |  |      |  |
|-----|----------------|-----------------------------------------------------------------------------------------------------------------------------------------------------------------------------------------------------------------------------------------------------------------------------------------------------------------------------------------------------------------------------------------------------------------------------------------------------------------------------------------------------------------------------------------------------------------------------------------------------------------------------------------------------------------------------------------------------------------------------------------------------------------------------------------------------------------------------------------------------------------------------------------------------------------------------------------------------------------------------------------------------------------------------------------------------------------------------------------------------------------------------------------------------------------------------------------------------|----------------|--------|--|------|--|
|     |                | mineralization OR decomposition OR pool OR outgas* ) AND (carbon OR "greenhouse gas*" OR GHG* OR CO2 OR CH4 OR methane OR "organic matter" OR Soil* OR biomass)                                                                                                                                                                                                                                                                                                                                                                                                                                                                                                                                                                                                                                                                                                                                                                                                                                                                                                                                                                                                                                     |                |        |  |      |  |
| #8  | Scopus         | (peat* OR black-water OR "black water" OR blackwater OR river OR floodplain OR swamp OR fluvial OR "organic soil*" OR "peat swamp*" OR PSF) AND<br>(amazon* OR peru* OR pantanal OR guyana* OR panama* OR venezuela OR bolivia* OR tropic* OR borne* OR congo* OR tropical OR sumatra OR borne* OR malaysi* OR "Southeast Asia*" OR indonesia* OR serawak OR sarawak OR Kalimantan OR neotropic* OR "Latin America") AND<br>(product* OR respiration OR *flux* OR sequest* OR emission*, OR dynamics OR accumulation OR subsidence OR balance OR cycl* OR stor* OR mineralization OR *composition OR pool OR outgas* OR sink* OR source* OR release* OR content OR substance* OR transport OR origin* OR processing OR distribution OR consumption OR character* OR export* OR change OR variation OR concentration OR degradation OR properties OR input OR loss* OR stock* OR ecosystem OR biomass OR soil* OR "npp" OR "root product*" OR sequest* OR heterotro* OR autotro* OR aboveground OR area OR extent) AND<br>(carbon OR "greenhouse gas*" OR ghg* OR co2 OR ch4 OR methane OR "organic mat*" OR biomass OR C OR humic OR biogeochem* OR DOC OR POC OR DIC OR 14C OR radiocarbon OR 13C) | 11th June 2020 | 8585   |  | 8585 |  |
| #9  | Scopus         | TITLE-ABS-KEY ( ( peat* OR "black water" OR "black*water" OR river* OR floodplain OR swamp* OR "organic soil*" OR histosol ) AND ( tropic* OR neotropic* OR amazon* OR peru* OR pantanal OR guyana* OR panama* OR venezuela OR bolivia* OR congo* OR "southeast asia*" OR sumatra OR borneo OR bornean OR malaysi* OR indonesia* OR brunei OR sarawak OR kalimantan ) AND ( carbon OR "greenhouse gas*" OR ghg* OR *co2 OR *ch4 OR methane OR "organic mat*" OR biomass OR c OR humic OR biogeochem* OR doc OR poc OR dic OR 13c OR 14c OR radiocarbon ) )                                                                                                                                                                                                                                                                                                                                                                                                                                                                                                                                                                                                                                          | 18th June 2020 | 8565   |  |      |  |
| #10 | Web of Science | TS=(( peat* OR "black water" OR "black*water" OR river* OR floodplain OR swamp* OR "organic soil*" OR histosol ) AND ( tropic* OR neotropic* OR amazon* OR peru* OR pantanal OR guyana* OR panama* OR venezuela OR bolivia* OR congo* OR "southeast asia*" OR sumatra OR borneo OR bornean OR malaysi* OR indonesia* OR brunei OR sarawak OR kalimantan ) AND ( carbon OR "greenhouse gas*" OR ghg* OR *co2 OR *ch4 OR methane OR "organic mat*" OR biomass OR c OR humic OR biogeochem* OR doc OR poc OR dic OR 13c OR 14c OR radiocarbon ) )                                                                                                                                                                                                                                                                                                                                                                                                                                                                                                                                                                                                                                                      | 18th June 2020 | 12526  |  |      |  |
| #11 | Web of Science | TS=( ( peat* OR "black water" OR black*water OR river* OR floodplain OR swamp* OR "orga                                                                                                                                                                                                                                                                                                                                                                                                                                                                                                                                                                                                                                                                                                                                                                                                                                                                                                                                                                                                                                                                                                             | 24th June 2020 | 12,464 |  |      |  |

|     |                |                                                                                                                                                                                                                                                                                                                                                                                                                                                                                                                                                                                                                                                                                                                                                                                                                                                                                                                                                                                                                                                                                                                                                                   |                |        |  |  |  |
|-----|----------------|-------------------------------------------------------------------------------------------------------------------------------------------------------------------------------------------------------------------------------------------------------------------------------------------------------------------------------------------------------------------------------------------------------------------------------------------------------------------------------------------------------------------------------------------------------------------------------------------------------------------------------------------------------------------------------------------------------------------------------------------------------------------------------------------------------------------------------------------------------------------------------------------------------------------------------------------------------------------------------------------------------------------------------------------------------------------------------------------------------------------------------------------------------------------|----------------|--------|--|--|--|
|     |                | nic soil*" OR histosol*) AND ( tropic* OR neotropic* OR amazon* OR peru* OR pentanal OR guyana * OR panama* OR venezuela OR bolivia* OR congo* OR "southeast asia*" OR indonesia* OR malaysi* OR brunei OR kalimantan OR sumatra OR borneo OR bornean OR sarawak ) AND ( carbon OR "greenhouse gas*" OR ghg* OR *co2 OR *ch4 OR methane OR "organic mat*" OR biomass OR c OR humic OR biogeochem* OR doc OR poc OR dic OR 13c OR 14c OR radiocarbon ) )                                                                                                                                                                                                                                                                                                                                                                                                                                                                                                                                                                                                                                                                                                           |                |        |  |  |  |
| #12 | Scopus         | TITLE-ABS-KEY ( ( peat* OR "black water" OR black*water OR river* OR floodplain OR swamp* OR "organic soil*" OR histosol*) AND ( tropic* OR neotropic* OR amazon* OR peru* OR pentanal OR guyana * OR panama* OR venezuela OR bolivia* OR congo* OR "southeast asia*" OR indonesia* OR malaysi* OR brunei OR kalimantan OR sumatra OR borneo OR bornean OR sarawak ) AND ( carbon OR "greenhouse gas*" OR ghg* OR *co2 OR *ch4 OR methane OR "organic mat*" OR biomass OR c OR humic OR biogeochem* OR doc OR poc OR dic OR 13c OR 14c OR radiocarbon ) )                                                                                                                                                                                                                                                                                                                                                                                                                                                                                                                                                                                                         | 24th June 2020 | 8,513  |  |  |  |
| #13 | Scopus         | TITLE-ABS-KEY ( ( peat* OR "black water" OR black*water OR river* OR floodplain OR swamp* OR "organic soil*" OR histosol*) AND ( tropic* OR neotropic* OR amazon* OR peru* OR pentanal OR guyana * OR panama* OR venezuela OR bolivia* OR congo* OR "southeast asia*" OR indonesia* OR malaysi* OR brunei OR kalimantan OR sumatra OR borneo OR bornean OR sarawak ) AND ( product* OR respiration OR *flux* OR sequest* OR emission*, OR dynamics OR accumulation OR subsidence OR balance OR cycle* OR storage* OR mineralization OR *composition OR pool OR outgas* OR sink* OR source* OR release* OR content OR substance* OR transport OR origin* OR processing OR distribution OR consumption OR character* OR export* OR change OR variation OR concentration OR degradation OR properties OR input OR loss* OR stock* OR ecosystem OR biomass OR soil* OR "npp" OR "root product*" OR sequest* OR heterotrophic* OR autotrophic* OR aboveground OR area OR extent ) AND ( carbon OR "greenhouse gas*" OR ghg* OR *co2 OR *ch4 OR methane OR "organic mat*" OR biomass OR c OR humic OR biogeochem* OR doc OR poc OR dic OR 13c OR 14c OR radiocarbon ) ) | 24th June 2020 | 8,176  |  |  |  |
| #14 | Web of Science | TS=( ( peat* OR "black water" OR black*water OR river* OR floodplain OR swamp* OR "organic soil*" OR histosol*) AND ( tropic* OR neotropic* OR amazon* OR peru* OR pentanal OR guyana * OR panama* OR venezuela OR bolivia* OR congo* OR "southeast asia*" OR indonesia* OR malaysi* OR brunei OR kalimantan OR sumatra OR borneo OR bornean OR sarawak ) AND ( carbon OR "greenhouse gas*" OR ghg* OR *co2 OR *ch4 OR methane OR "organic mat*" OR biomass OR c OR humic OR biogeochem* OR doc OR poc OR dic OR 13c OR 14c OR radiocarbon ) )                                                                                                                                                                                                                                                                                                                                                                                                                                                                                                                                                                                                                    | 24th June 2020 | 12,023 |  |  |  |

|     |                |                                                                                                                                                                                                                                                                                                                                                                                                                                                                                                                                                                                                                                                                                                                                                                                                                        |                |        |  |  |                                                                                |
|-----|----------------|------------------------------------------------------------------------------------------------------------------------------------------------------------------------------------------------------------------------------------------------------------------------------------------------------------------------------------------------------------------------------------------------------------------------------------------------------------------------------------------------------------------------------------------------------------------------------------------------------------------------------------------------------------------------------------------------------------------------------------------------------------------------------------------------------------------------|----------------|--------|--|--|--------------------------------------------------------------------------------|
|     |                | tra OR borneo OR bornean OR sarawak ) AND ( product* OR respiration OR *flux* OR sequest* OR emission*, OR dynamics OR accumulation OR subsidence OR balance OR cycl* OR stor* OR mineralization OR *composition OR pool OR outgas* OR sink* OR source* OR release* OR content OR substance* OR transport OR origin* OR processing OR distribution OR consumption OR character* OR export* OR change OR variation OR concentration OR degradation OR properties OR input OR loss* OR stock* OR ecosystem OR biomass OR soil* OR "npp" OR "root product*" OR sequest* OR heterotro* OR autotro* OR aboveground OR area OR extent ) AND ( carbon OR "greenhouse gas*" OR ghg* OR *co2 OR *ch4 OR methane OR "organic mat*" OR biomass OR c OR humic OR biogeochem* OR doc OR poc OR dic OR 13c OR 14c OR radiocarbon ) ) |                |        |  |  |                                                                                |
| #15 | Scopus         | TITLE-ABS-KEY ( peat* OR "black water" OR black*water OR river* OR floodplain OR swamp* OR "organic soil*" OR histosol* ) AND TITLE-ABS-KEY ( tropic* OR neotropic* OR amazon* OR peru* OR pantanal OR guyana* OR panama* OR venezuela OR bolivia* OR congo* OR "southeast asia*" OR indonesia* OR malaysi* OR brunei OR kalimantan OR sumatra OR borneo OR bornean OR sarawak ) AND TITLE-ABS-KEY ( carbon OR "greenhouse gas*" OR ghg* OR *co2 OR *ch4 OR methane OR "organic mat*" OR biomass OR c OR humic OR biogeochem* OR doc OR poc OR dic OR 13c OR 14c OR radiocarbon )                                                                                                                                                                                                                                      | 25th June 2020 | 8,586  |  |  | Similar to search #13, but correcting the spelling of “pentanal” to “pantanal” |
| #16 | Web of Science | TS=(peat* OR "black water" OR black*water OR river* OR floodplain OR swamp* OR “organic soil*” OR histosol*) AND TS=(tropic* OR neotropic* OR amazon* OR peru* OR pantanal OR guyana* OR panama* OR venezuela OR bolivia* OR congo* OR "southeast asia*" OR indonesia* OR malaysi* OR brunei OR kalimantan OR sumatra OR borneo OR bornean OR sarawak) AND TS=(carbon OR "greenhouse gas*" OR ghg* OR *co2 OR *ch4 OR methane OR "organic mat*" OR biomass OR C OR humic OR biogeochem* OR DOC OR POC OR DIC OR 13C OR 14C OR radiocarbon)                                                                                                                                                                                                                                                                             | 25th June 2020 | 12,767 |  |  | Similar to search #12, but correcting the spelling of “pentanal” to “pantanal” |
| #17 | Scopus         | TITLE-ABS-KEY ( peat* OR "black water" OR black*water OR river* OR floodplain OR swamp* OR "organic soil*" OR histosol* ) AND TITLE-ABS-KEY ( tropic* OR neotropic* OR amazon* OR pantanal OR colombia* OR guyana OR peru* OR venezuela OR panama* OR "southeast asia*" OR indonesia* OR malaysia* OR brunei OR papua OR borneo OR bornean OR sumatra OR kalimantan OR sarawak OR uganda OR congo* OR okavango ) AND TITLE-ABS-KEY ( carbon OR "greenhouse gas*" OR ghg* OR *co2 OR *ch4 OR methane OR "organic mat*" OR biomass OR c OR humic OR biogeochem* OR doc OR poc OR dic OR 13c OR 14c OR radiocarbon )                                                                                                                                                                                                      | 30th June 2020 | 9,002  |  |  | Updated [geographical location] category                                       |



|     |                |                                                                                                                                                                                                                                                                                                                                                                                                                                                                                                                                                                              |                |        |  |  |                                          |
|-----|----------------|------------------------------------------------------------------------------------------------------------------------------------------------------------------------------------------------------------------------------------------------------------------------------------------------------------------------------------------------------------------------------------------------------------------------------------------------------------------------------------------------------------------------------------------------------------------------------|----------------|--------|--|--|------------------------------------------|
| #18 | Web of Science | TS=(peat* OR "black water" OR black*water OR river* OR floodplain OR swamp* OR "organic soil*" OR histosol*) AND TS=(tropic* OR neotropical* OR amazon* OR peru* OR pantanal OR guyana OR panama* OR venezuela OR congo* OR "southeast asia*" OR indonesia* OR malaysia* OR brunei OR kalimantan OR sumatra OR borneo OR bornean OR sarawak OR colombia* OR papua OR okavango OR uganda) AND TS=(carbon OR "greenhouse gas*" OR ghg* OR *co2 OR *ch4 OR methane OR "organic mat*" OR biomass OR C OR humic OR biogeochem* OR DOC OR POC OR DIC OR 13C OR 14C OR radiocarbon) | 30th June 2020 | 13,344 |  |  | Updated [geographical location] category |
|-----|----------------|------------------------------------------------------------------------------------------------------------------------------------------------------------------------------------------------------------------------------------------------------------------------------------------------------------------------------------------------------------------------------------------------------------------------------------------------------------------------------------------------------------------------------------------------------------------------------|----------------|--------|--|--|------------------------------------------|

## Supplementary Information

**Table S3.** List of structured questions and stratified responses to assess study validity

| Sections               | Questions                                                                                      | High quality study<br>(Response score: 1)                                                                                                                                   | Medium quality study<br>(Response score: 0.5)                               | Low quality study<br>(Response score: 0)                           |
|------------------------|------------------------------------------------------------------------------------------------|-----------------------------------------------------------------------------------------------------------------------------------------------------------------------------|-----------------------------------------------------------------------------|--------------------------------------------------------------------|
| Study Site             | Is there information provided on the study site's environment?                                 | Relevant information including climate, hydrology, geology, human activities or disturbances condition                                                                      | Minimum single relevant information is required                             | No available relevant information                                  |
|                        | Does the study present spatial variability (multiple plots)?                                   | Data are primary collected from more than one location                                                                                                                      | Study data are obtained from at least single location                       | Not available or No relevant data on carbon dynamics are presented |
|                        | Does the study have or present temporal variability (multiple field visit)?                    | Data are primary collected from more than one time of measurement                                                                                                           | Study data are obtained from at least single time of measurement            | Not available or No relevant data on carbon dynamics are presented |
|                        | Is the sampling strategy clearly described?                                                    | Multiple factors describing data variation must be presented (e.g., different land cover, vegetation stand, land elevation, coastal vs upland peatland, seasonal variation) | Minimum single factor describing data variation is presented                | Not available or No sampling strategy is presented                 |
| Material and Methods   | Are the data collection methods clearly explained and replicable?                              | Study must describe total samples collected, methods and equipment used, period of data collection                                                                          | Study presents at least number of samples or sampling                       | No number of sample is described                                   |
|                        | Are the data analysis clearly explained (e.g., repeatable data analysis)?                      | Details of replicable data analysis method or code must be described                                                                                                        | Study presents partly data analysis                                         | Not available                                                      |
| Results                | Are the results being describe accordingly to the variables assessed?                          | Data are described following multiple factors such as land uses or covers, season, elevation, vegetation stand, peat depth, peat characteristics                            | Data are described following at least single factor                         | Not available or No carbon dynamic data are presented              |
|                        | Does the results includes means, standard deviation or range (min; max) and amount of samples? | Data presentation must contains mean or average, standard error or deviation, and number of samples                                                                         | Study data contain at least mean or average                                 | Not available or No carbon dynamic data are presented              |
| Additional Information | Are the carbon data easily and precisely accessible?                                           | Data must be presented in table or figure with average value and standard deviation                                                                                         | Study data contain at least mean or average in either figure, table or text | Not available or No carbon dynamic data are presented              |

|  |                                                        |                                                                                                                                       |                                                                                                                                       |                                                                                                                                       |
|--|--------------------------------------------------------|---------------------------------------------------------------------------------------------------------------------------------------|---------------------------------------------------------------------------------------------------------------------------------------|---------------------------------------------------------------------------------------------------------------------------------------|
|  | Does the paper include an additional information file? | Yes or no (this question is used to identify raw data presentation in the Supplementary Information for future data extraction stage) | Yes or no (this question is used to identify raw data presentation in the Supplementary Information for future data extraction stage) | Yes or no (this question is used to identify raw data presentation in the Supplementary Information for future data extraction stage) |
|  | Is the study related to terrestrial, aquatic or both?  | Study is relevant to at least either terrestrial, aquatic, both terrestrial and aquatic carbon pathways                               | Study is relevant to at least either terrestrial, aquatic, both terrestrial and aquatic carbon pathways                               | Study is relevant to at least either terrestrial, aquatic, both terrestrial and aquatic carbon pathways                               |

## Supplementary Information

**Table S4.** List of data extraction variables and sub-variables for tropical peatlands carbon cycling systematic review

| Variable                           | Sub-variable 1 | Sub-variable 2                     | Description                                                                                                                                                                                                                                                                                               | Expected unit(s) |
|------------------------------------|----------------|------------------------------------|-----------------------------------------------------------------------------------------------------------------------------------------------------------------------------------------------------------------------------------------------------------------------------------------------------------|------------------|
| <b>General information</b>         |                | ID_key                             | Original ID assigned to the paper at the start of the systematic review                                                                                                                                                                                                                                   |                  |
|                                    |                | Data_extractor                     | Initials (First name, Last name) of person extracting data                                                                                                                                                                                                                                                |                  |
|                                    |                | Data_extraction_date (DD/MM/YYYY)  | Date that data is being extracted                                                                                                                                                                                                                                                                         |                  |
| <b>Publication information</b>     |                | Authors                            | Authors of the paper                                                                                                                                                                                                                                                                                      |                  |
|                                    |                | Title                              | Title of the paper                                                                                                                                                                                                                                                                                        |                  |
|                                    |                | Pub_year                           | Year that the paper was published                                                                                                                                                                                                                                                                         |                  |
|                                    |                | Aims_objectives                    | Aims and/or objectives of the paper. This is usually found in the last paragraph of the first section (Introduction)                                                                                                                                                                                      |                  |
| <b>Full-text screening outcome</b> |                | Full-text_screening_rating         | Score assigned to a paper (0 to 9) during the full-text screening                                                                                                                                                                                                                                         |                  |
|                                    |                | Population                         | One or more keywords in search string: (peat* OR "black water" OR black*water OR river* OR floodplain OR swamp* OR "organic soil*" OR histosol*)                                                                                                                                                          |                  |
|                                    |                | Site_name_or_geographical_location | One or more keywords in search string: (tropic* OR neotropic* OR amazon* OR pantanal OR colombia* OR guyana OR peru* OR venezuela OR panama* OR "southeast asia*" OR indonesia* OR malaysia* OR brunei OR papua OR borneo OR bornean OR sumatra OR kalimantan OR sarawak OR uganda OR congo* OR okavango) |                  |
|                                    |                | Country                            | Country or list of countries studied                                                                                                                                                                                                                                                                      |                  |

|                               |  |                                             |                                                                                                                                                                                                                                                                                                                                                                                                                                                                     |  |
|-------------------------------|--|---------------------------------------------|---------------------------------------------------------------------------------------------------------------------------------------------------------------------------------------------------------------------------------------------------------------------------------------------------------------------------------------------------------------------------------------------------------------------------------------------------------------------|--|
|                               |  | Outcome                                     | One or more keywords in search string:<br>(carbon OR "greenhouse gas*" OR ghg* OR *co2 OR *ch4 OR methane OR "organic mat*" OR biomass OR c OR humic OR biogeochem* OR doc OR poc OR dic OR 13c OR 14c OR radiocarbon)                                                                                                                                                                                                                                              |  |
|                               |  | Study_type                                  | One of the following study types: field-based (F), lab-based (L), remote sensing (RS), review (R), modelling (M))                                                                                                                                                                                                                                                                                                                                                   |  |
|                               |  | Supplementary_information_file_availability | Whether there is additional supplementary/supporting information provided                                                                                                                                                                                                                                                                                                                                                                                           |  |
|                               |  | Terrestrial_aquatic_or_both                 | Whether the study is related to terrestrial components, aquatic components or both                                                                                                                                                                                                                                                                                                                                                                                  |  |
|                               |  | Comments_from_full-text_screening           | Comments from the full-text screening (column AC)                                                                                                                                                                                                                                                                                                                                                                                                                   |  |
| <b>Study site information</b> |  | Land_use_type                               | Select from these options:<br>Disturbed or undisturbed                                                                                                                                                                                                                                                                                                                                                                                                              |  |
|                               |  | Land_use_description                        | Select from these options:<br><u>For Land_use_type - "Undisturbed":</u><br>- Undisturbed PSF (intact or natural forest)<br><u>For Land_use_type - "Disturbed":</u><br>- Acacia plantation<br>- Agroforestry<br>- Burnt peatland<br>- Cropland<br>- Drained PSF (drained but not logged or converted to plantation)<br>- Logged PSF (logged/deforested/cleared forest)<br>- Oil palm plantation<br>- Secondary PSF (regeneration or vegetation regrowth)<br>- Others |  |

|  |  |                                      |                                                                                                                                                                                                                                                                                                                                                                        |                                                                                                                                                      |
|--|--|--------------------------------------|------------------------------------------------------------------------------------------------------------------------------------------------------------------------------------------------------------------------------------------------------------------------------------------------------------------------------------------------------------------------|------------------------------------------------------------------------------------------------------------------------------------------------------|
|  |  | Site_or_catchment_name               | Name of the river/river basin, national park, or watershed/catchment unit                                                                                                                                                                                                                                                                                              |                                                                                                                                                      |
|  |  | Site_ID                              | Self-generated based on land use description and site/catchment name. Try to use the terminology used in the paper for so that it'll be easier for extracting data and faster if we need to recheck the data at some point. E.g. you may choose to label a natural PSF and an oil palm plantation in the Kampar peninsula as nPSF_Kampar and OPP_Kampar, respectively. |                                                                                                                                                      |
|  |  | Latitude                             |                                                                                                                                                                                                                                                                                                                                                                        | Expressed in Decimal Degrees (DD) - use this convertor:<br><a href="https://www.pgc.umn.edu/apps/convert/">https://www.pgc.umn.edu/apps/convert/</a> |
|  |  | Longitude                            |                                                                                                                                                                                                                                                                                                                                                                        | Expressed in Decimal Degrees (DD) - use this convertor:<br><a href="https://www.pgc.umn.edu/apps/convert/">https://www.pgc.umn.edu/apps/convert/</a> |
|  |  | Sampling_season                      | Please input: Dry, wet, dry and wet or what the paper states                                                                                                                                                                                                                                                                                                           |                                                                                                                                                      |
|  |  | Sampling_date                        | Month(s) and/or year(s) of sampling campaign                                                                                                                                                                                                                                                                                                                           |                                                                                                                                                      |
|  |  | Historical_precipitation_records     | Annual mean precipitation in study location                                                                                                                                                                                                                                                                                                                            | mm                                                                                                                                                   |
|  |  | Precipitation_during_sampling_period | Monthly or annual precipitation during sampling period                                                                                                                                                                                                                                                                                                                 | mm                                                                                                                                                   |
|  |  | Historical_temperature_records       | Annual mean temperature in study location                                                                                                                                                                                                                                                                                                                              | degree Celsius                                                                                                                                       |
|  |  | Temperature_during_sampling_period   | Monthly or annual temperature during sampling period                                                                                                                                                                                                                                                                                                                   | degree Celsius                                                                                                                                       |
|  |  | Catchment_area                       | Area of catchment under study                                                                                                                                                                                                                                                                                                                                          | ha; m2; km2                                                                                                                                          |
|  |  | Percentage_peat_coverage             | Proportion of catchment where there are peat deposits                                                                                                                                                                                                                                                                                                                  | %                                                                                                                                                    |

|                         |  |                          |                                                                                                                                       |                                                                                      |
|-------------------------|--|--------------------------|---------------------------------------------------------------------------------------------------------------------------------------|--------------------------------------------------------------------------------------|
| <b>Sample type</b>      |  | Sample_type              | Select from these options:<br>GHG, peat soil, vegetation, porewater,<br>channel water                                                 |                                                                                      |
| <b>Carbon stocks</b>    |  | Aboveground_biomass      | Includes all biomass in living vegetation above the soil including stems, stumps, branches, bark, seeds and foliage                   | ton dry weight/ha or ton carbon/ha or mega gram dry weight/ha or mega gram carbon/ha |
|                         |  | Belowground_biomass      | Includes biomass of all live roots (does not include dead and/or dislocated root tissue, nor does it include soil organic matter)     | ton dry weight/ha or ton carbon/ha or mega gram dry weight/ha or mega gram carbon/ha |
|                         |  | Litter_carbon_stocks     | Includes dead plant material such as leaves, branches and twigs that was once attached to living plants but have fallen to the ground | ton dry weight/ha or ton carbon/ha or mega gram dry weight/ha or mega gram carbon/ha |
|                         |  | Soil_carbon_stocks       | Includes soil organic matter with known carbon content                                                                                | ton carbon/ha or mega gram carbon/ha                                                 |
| <b>Forest structure</b> |  | Tree_density             | Usually expressed as the number of trees per unit area                                                                                | trees/ha or stems/ha                                                                 |
|                         |  | Basal_area               | Defined as the total cross-sectional area of all stems in a stand measured at breast height, and expressed as per unit of land area   | m <sup>2</sup> /ha                                                                   |
|                         |  | Tree_diameter            | Diameter at breast height (DBH)                                                                                                       | cm                                                                                   |
| <b>Productivity</b>     |  | Litter_production        | Rate of litter biomass productivity per unit area per unit time                                                                       | ton dry weight/ha/yr or ton carbon/ha/yr                                             |
|                         |  | Stem_productivity        | Rate of stem/tree biomass productivity per unit area per unit time                                                                    | ton dry weight/ha/yr or ton carbon/ha/yr                                             |
|                         |  | Root_productivity        | Rate of coarse or fine root biomass productivity per unit area per unit time                                                          | ton dry weight/ha/yr or ton carbon/ha/yr                                             |
|                         |  | Litter_decomposition     | Rate of litter organic matter decomposition per unit area per unit time                                                               | ton dry weight/ha/yr or ton carbon/ha/yr                                             |
| <b>Depth</b>            |  | Peat_depth               | Depth of peat (or peat dome)                                                                                                          | m; cm                                                                                |
|                         |  | Peat_sampling_depth      | Depth of peat that was sampled                                                                                                        | m; cm                                                                                |
|                         |  | Porewater_sampling_depth | Depth of porewater that was sampled                                                                                                   | m; cm                                                                                |

|                                              |  |                               |                                                                                                                                                                                                           |                       |
|----------------------------------------------|--|-------------------------------|-----------------------------------------------------------------------------------------------------------------------------------------------------------------------------------------------------------|-----------------------|
|                                              |  | Water_table_depth             | Groundwater level - positive values indicate that the surface is submerged, negative values indicate water table levels below the surface (e.g. if water table is 60 cm below the surface, report as -60) | m; cm                 |
|                                              |  | Channel_depth                 | Depth of water channel, where channel can be a natural river and/or stream or an artificial drainage canal                                                                                                | m; cm                 |
| <b>Soil physicochemical properties</b>       |  | Soil_dry_weight               | Dry weight of soil sample                                                                                                                                                                                 | g                     |
|                                              |  | Soil_bulk_density             | Usually termed dry bulk density; weight of dry soil divided by the total soil volume                                                                                                                      | g cm-3                |
|                                              |  | Soil_C_content                | Amount of carbon in soil sample                                                                                                                                                                           | % or mg/g             |
|                                              |  | Soil_C_density                | Density of carbon in soil sample                                                                                                                                                                          | gC cm-3               |
|                                              |  | Soil_N_content                | Amount of nitrogen in soil sample                                                                                                                                                                         | % or mg/g             |
|                                              |  | Soil_CN_ratio                 | Ratio of soil C / soil N                                                                                                                                                                                  | no units              |
|                                              |  | Soil_organic_matter_content   | Organic matter content in soil                                                                                                                                                                            | %                     |
|                                              |  | Soil_ash_content              | Amount of ash in soil sample determined by combusting sample                                                                                                                                              | %                     |
|                                              |  | Soil_soluble_organic_C        |                                                                                                                                                                                                           | mg/kg                 |
|                                              |  | Soil_13C                      | Isotopic 13C signature of soil                                                                                                                                                                            | per-mille (‰)         |
|                                              |  | Soil_15N                      | Isotopic 15N signature of soil                                                                                                                                                                            | per-mille (‰)         |
|                                              |  | Soil_14C_age                  | Radiocarbon age of soil; usually expressed in BP (before present) or %modern/pMC (percent modern carbon)                                                                                                  | BP; %modern; pMC      |
|                                              |  | Soil_redox_potential          | Also termed Eh                                                                                                                                                                                            | volts (V; mV)         |
|                                              |  | Soil_cation_exchange_capacity |                                                                                                                                                                                                           | mval/100g; cmol(+)/kg |
|                                              |  | Ammonium_NH4+                 |                                                                                                                                                                                                           | mg/kg                 |
|                                              |  | Nitrate_NO3-                  |                                                                                                                                                                                                           | mg/kg                 |
|                                              |  | Iron_Fe2+                     |                                                                                                                                                                                                           | mg/kg                 |
| <b>Vegetation physicochemical properties</b> |  | Leaf_C_content                | Amount of carbon in leaf sample                                                                                                                                                                           | %                     |
|                                              |  | Leaf_N_content                | Amount of nitrogen in leaf sample                                                                                                                                                                         | %                     |
|                                              |  | Leaf_CN_ratio                 | Leaf C / Leaf N                                                                                                                                                                                           | No units              |



|                             |      |                               |                                                                                                                                                                                                                       |                                                       |
|-----------------------------|------|-------------------------------|-----------------------------------------------------------------------------------------------------------------------------------------------------------------------------------------------------------------------|-------------------------------------------------------|
|                             |      | Leaf_13C                      | Isotopic 13C signature of leaf                                                                                                                                                                                        | per-mille (‰)                                         |
|                             |      | Leaf_15N                      | Isotopic 15N signature of leaf                                                                                                                                                                                        | per-mille (‰)                                         |
|                             |      | Root_C_content                | Amount of carbon in root sample                                                                                                                                                                                       | %                                                     |
|                             |      | Root_N_content                | Amount of nitrogen in root sample                                                                                                                                                                                     | %                                                     |
|                             |      | Root_CN_ratio                 | Root C / Root N                                                                                                                                                                                                       | no units                                              |
|                             |      | Root_13C                      | Isotopic 13C signature of root                                                                                                                                                                                        | per-mille (‰)                                         |
|                             |      | Root_15N                      | Isotopic 15N signature of root                                                                                                                                                                                        | per-mille (‰)                                         |
| <b>pH</b>                   |      | Soil_pH                       | pH is a measure of acidity                                                                                                                                                                                            | No units                                              |
|                             |      | Porewater_pH                  | pH is a measure of acidity                                                                                                                                                                                            | No units                                              |
|                             |      | Channel_pH                    | pH is a measure of acidity                                                                                                                                                                                            | No units                                              |
| <b>Salinity</b>             |      | Porewater_salinity            |                                                                                                                                                                                                                       | ppm                                                   |
|                             |      | Channel_salinity              |                                                                                                                                                                                                                       | ppm                                                   |
| <b>Conductivity</b>         |      | Soil_conductivity             | Usually termed specific conductivity or electrical conductivity                                                                                                                                                       | mS/m or $\mu$ S/cm                                    |
|                             |      | Porewater_conductivity        | Usually termed specific conductivity or electrical conductivity                                                                                                                                                       | mS/m or $\mu$ S/cm                                    |
|                             |      | Channel_conductivity          | Usually termed specific conductivity or electrical conductivity                                                                                                                                                       | mS/m or $\mu$ S/cm                                    |
| <b>Temperature</b>          |      | Soil_temperature              |                                                                                                                                                                                                                       | degree Celsius                                        |
|                             |      | Porewater_temperature         |                                                                                                                                                                                                                       | degree Celsius                                        |
|                             |      | Channel_temperature           |                                                                                                                                                                                                                       | degree Celsius                                        |
| <b>Dissolved oxygen</b>     |      | Porewater_DO                  | mg/L is the preferred unit                                                                                                                                                                                            | mg/L; $\mu$ mol/L; % sat                              |
|                             |      | Channel_DO                    | mg/L is the preferred unit                                                                                                                                                                                            | mg/L; $\mu$ mol/L; % sat                              |
| <b>Discharge</b>            |      | Channel_discharge             | Expressed as volume per unit time                                                                                                                                                                                     | m <sup>3</sup> /s; m <sup>3</sup> /min; L/s           |
| <b>CO2 (carbon dioxide)</b> | Flux | Total_soil_efflux_CO2         | Usually termed total soil/ecosystem respiration = heterotrophic respiration + autotrophic respiration; CO2 emitted from soil surface to the atmosphere                                                                | g/cm <sup>2</sup> /s; mol/m <sup>2</sup> /s; Mg/ha/yr |
|                             |      | Heterotrophic_soil_efflux_CO2 | Usually termed heterotrophic respiration - the metabolism of organic matter by bacteria and fungi; it excludes autotrophic respiration which includes metabolism of organic matter by plants (e.g. living roots); CO2 | g/cm <sup>2</sup> /s; Mg/ha/yr                        |

|               |  |                                      |                                                                                                                                        |                               |
|---------------|--|--------------------------------------|----------------------------------------------------------------------------------------------------------------------------------------|-------------------------------|
|               |  |                                      | emitted from soil surface to the atmosphere                                                                                            |                               |
|               |  | Autotrophic_soil_efflux_CO2          | Usually termed autotrophic respiration - the metabolism of organic matter by plants (e.g. living roots); CO2 emitted from soil surface | g/cm2/s; mol/m2/s; Mg/ha/yr   |
|               |  | Channel_efflux_CO2_vertical          | CO2 emitted from channel surface to the atmosphere                                                                                     | g/cm2/s; mol/m2/s; Mg/ha/yr   |
| Concentration |  | Porewater_dissolved_CO2_or_pCO2      | Dissolved CO2 = aqueous phase of CO2; pCO2 = partial pressure of CO2 (gaseous phase)                                                   | µatm; ppm; µmol/L             |
|               |  | Channel_dissolved_CO2_or_pCO2        | Dissolved CO2 = aqueous phase of CO2; pCO2 = partial pressure of CO2 (gaseous phase)                                                   | µatm; ppm; µmol/L             |
| Yield/export  |  | Channel_lateral_export_dissolved_CO2 | Lateral export of dissolved CO2 from channel or any fluvial component                                                                  | µmol/sec; µmol/min; µmol/hour |
| 14C-CO2       |  | Soil_efflux_14C-CO2_age              | Radiocarbon age of soil CO2 efflux; usually expressed in BP (before present) or %modern/pMC (percent modern carbon)                    | BP; %modern; pMC              |
|               |  | Channel_efflux_14C-CO2_age_vertical  | Radiocarbon age of channel CO2 efflux; usually expressed in BP (before present) or %modern/pMC (percent modern carbon)                 | BP; %modern; pMC              |
|               |  | Porewater_14C-CO2_age                | Radiocarbon age of porewater dissolved CO2; usually expressed in BP (before present) or %modern/pMC (percent modern carbon)            | BP; %modern; pMC              |
|               |  | Channel_14C-CO2_age                  | Radiocarbon age of channel dissolved CO2; usually expressed in BP (before present) or %modern/pMC (percent modern carbon)              | BP; %modern; pMC              |
| 13C-CO2       |  | Soil_efflux_13C-CO2                  | Isotopic 13C signature of soil CO2 efflux                                                                                              | per-mille (‰)                 |

|                          |               |                                      |                                                                                                                             |                               |
|--------------------------|---------------|--------------------------------------|-----------------------------------------------------------------------------------------------------------------------------|-------------------------------|
|                          |               | Channel_efflux_13C-CO2_vertical      | Isotopic 13C signature of channel CO2 efflux                                                                                | per-mille (‰)                 |
|                          |               | Porewater_13C-CO2                    | Isotopic 13C signature of porewater dissolved CO2                                                                           | per-mille (‰)                 |
|                          |               | Channel_13C-CO2                      | Isotopic 13C signature of channel dissolved CO2                                                                             | per-mille (‰)                 |
| <b>CH4<br/>(methane)</b> | Flux          | Soil_efflux_CH4                      | CH4 emitted from soil surface to the atmosphere                                                                             | g/cm2/s; Mg/ha/yr             |
|                          |               | Channel_efflux_CH4_vertical          | CH4 emitted from channel surface to the atmosphere                                                                          | g/cm2/s; Mg/ha/yr             |
|                          | Concentration | Porewater_dissolved_CH4_or_pCH4      | Dissolved CH4 = aqueous phase of CH4; pCH4 = partial pressure of CH4 (gaseous phase)                                        | µatm; ppm; µmol/L             |
|                          |               | Channel_dissolved_CH4_or_pCH4        | Dissolved CH4 = aqueous phase of CH4; pCH4 = partial pressure of CH4 (gaseous phase)                                        | µatm; ppm; µmol/L             |
|                          | Yield/export  | Channel_lateral_export_dissolved_CH4 | Lateral export of dissolved CH4 from channel or any fluvial component                                                       | µmol/sec; µmol/min; µmol/hour |
|                          | 14C-CH4       | Soil_efflux_14C-CH4_age              | Radiocarbon age of soil CH4 efflux; usually expressed in BP (before present) or %modern/pMC (percent modern carbon)         | BP; %modern; pMC              |
|                          |               | Channel_efflux_14C-CH4_age           | Radiocarbon age of channel CH4 efflux; usually expressed in BP (before present) or %modern/pMC (percent modern carbon)      | BP; %modern; pMC              |
|                          |               | Porewater_14C-CH4_age                | Radiocarbon age of porewater dissolved CH4; usually expressed in BP (before present) or %modern/pMC (percent modern carbon) | BP; %modern; pMC              |
|                          |               | Channel_14C-CH4_age                  | Radiocarbon age of channel dissolved CO2; usually expressed in BP (before present) or %modern/pMC (percent modern carbon)   | BP; %modern; pMC              |
|                          | 13C-CH4       | Soil_efflux_13C-CH4                  | Isotopic 13C signature of soil CH4 efflux                                                                                   | per-mille (‰)                 |
|                          |               | Channel_efflux_13C-CH4               | Isotopic 13C signature of channel CH4 efflux                                                                                | per-mille (‰)                 |

|                                             |               |                            |                                                                                                                   |                                                           |
|---------------------------------------------|---------------|----------------------------|-------------------------------------------------------------------------------------------------------------------|-----------------------------------------------------------|
|                                             |               | Porewater_13C-CH4          | Isotopic 13C signature of porewater dissolved CH4                                                                 | per-mille (‰)                                             |
|                                             |               | Channel_13C-CH4            | Isotopic 13C signature of porewater dissolved CH4                                                                 | per-mille (‰)                                             |
| <b>DIC<br/>(dissolved inorganic carbon)</b> | Concentration | Porewater_DIC              | DIC concentration in the peat porewater                                                                           | mg/L; µmol/L                                              |
|                                             |               | Channel_DIC                | DIC concentration in a channel or any fluvial component                                                           | mg/L; µmol/L                                              |
|                                             | Yield/export  | Channel_lateral_export_DIC | Lateral export of DIC from channel or any fluvial component                                                       | µmol/sec; µmol/min; µmol/hour; mgC/sec; mgC/min; mgC/hour |
|                                             | 14C-DIC       | Porewater_14C-DIC_age      | Radiocarbon age of porewater DIC; usually expressed in BP (before present) or %modern/pMC (percent modern carbon) | BP; %modern; pMC                                          |
|                                             |               | Channel_14C-DIC_age        | Radiocarbon age of channel DIC; usually expressed in BP (before present) or %modern/pMC (percent modern carbon)   | BP; %modern; pMC                                          |
|                                             | 13C-DIC       | Porewater_13C-DIC          | Isotopic 13C signature of porewater DIC                                                                           | per-mille (‰)                                             |
|                                             |               | Channel_13C-DIC            | Isotopic 13C signature of channel DIC                                                                             | per-mille (‰)                                             |
| <b>DOC<br/>(dissolved organic carbon)</b>   | Concentration | Porewater_DOC              | DOC concentration in the peat porewater                                                                           | mg/L; µmol/L                                              |
|                                             |               | Channel_DOC                | DOC concentration in a channel or any fluvial component                                                           | mg/L; µmol/L                                              |
|                                             | Yield/export  | Channel_lateral_export_DOC | Lateral export of DOC from channel or any fluvial component                                                       | µmol/sec; µmol/min; µmol/hour; mgC/sec; mgC/min; mgC/hour |
|                                             | 14C-DOC       | Porewater_14C-DOC_age      | Radiocarbon age of porewater DOC; usually expressed in BP (before present) or %modern/pMC (percent modern carbon) | BP; %modern; pMC                                          |
|                                             |               | Channel_14C-DOC_age        | Radiocarbon age of channel DOC; usually expressed in BP (before present) or %modern/pMC (percent modern carbon)   | BP; %modern; pMC                                          |
|                                             | 13C-DOC       | Porewater_13C-DOC          | Isotopic 13C signature of porewater DOC                                                                           | per-mille (‰)                                             |

|                                         |               |                            |                                                                                                                   |                                                           |
|-----------------------------------------|---------------|----------------------------|-------------------------------------------------------------------------------------------------------------------|-----------------------------------------------------------|
|                                         |               | Channel_13C-DOC            | Isotopic 13C signature of channel DOC                                                                             | per-mille (‰)                                             |
| <b>POC (particulate organic carbon)</b> | Concentration | Channel_POC                | POC concentration in a channel or any fluvial component                                                           | mg/L; µmol/L                                              |
|                                         | CN ratio      | Channel_CN                 | TOC / TN                                                                                                          | No units                                                  |
|                                         | Yield/export  | Channel_lateral_export_POC | Lateral export of POC from channel or any fluvial component                                                       | µmol/sec; µmol/min; µmol/hour; mgC/sec; mgC/min; mgC/hour |
|                                         | 14C-POC       | Channel_14C-POC_age        | Radiocarbon age of channel POC; usually expressed in BP (before present) or %modern/pMC (percent modern carbon)   | BP; %modern; pMC                                          |
|                                         | 13C-POC       | Channel_13C-POC            | Isotopic 13C signature of channel POC                                                                             | per-mille (‰)                                             |
| <b>TOC (total organic carbon)</b>       | Concentration | Porewater_TOC              | TOC (DOC + POC) concentration in the peat porewater                                                               | mg/L; µmol/L                                              |
|                                         |               | Channel_TOC                | TOC (DOC + POC) concentration in channel                                                                          | mg/L; µmol/L                                              |
|                                         |               | Channel_TSS                | Total Suspended Sediment (or Suspended Particulate Matter - SPM) concentration in channel                         | mg/L; µmol/L                                              |
|                                         | Yield/export  | Channel_lateral_export_TOC | Lateral export of TOC from channel or any fluvial component                                                       | µmol/sec; µmol/min; µmol/hour; mgC/sec; mgC/min; mgC/hour |
|                                         | 14C-TOC       | Porewater_14C-TOC_age      | Radiocarbon age of porewater TOC; usually expressed in BP (before present) or %modern/pMC (percent modern carbon) | BP; %modern; pMC                                          |
|                                         |               | Channel_14C-TOC_age        | Radiocarbon age of channel TOC; usually expressed in BP (before present) or %modern/pMC (percent modern carbon)   | BP; %modern; pMC                                          |
|                                         | 13C-TOC       | Porewater_13C-TOC          | Isotopic 13C signature of porewater TOC                                                                           | per-mille (‰)                                             |
|                                         |               | Channel_13C-TOC            | Isotopic 13C signature of channel TOC                                                                             | per-mille (‰)                                             |
